# Supplementary material
Source: Springer Nature journal article supplement (https://www.springermedizin.de/resource/supplementary/12872_2009_288_MOESM9_ESM.pdf/9429622)

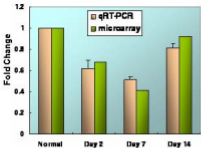

miR-126

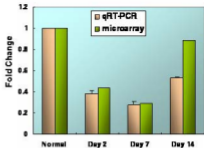

miR-499-5p

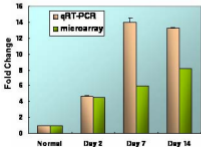

miR-31

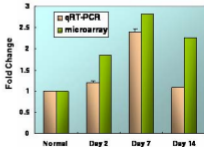

miR-214

Supplement: MOESM9 [file 9429622]
